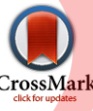

# Identification of Autoantibodies against Transthyretin for the Screening and Diagnosis of Rheumatoid Arthritis

Saurabh Sharma<sup>1,2</sup>, Sreejoyee Ghosh<sup>1</sup>, Lalit Kumar Singh<sup>1</sup>, Ashish Sarkar<sup>1</sup>, Rajesh Malhotra<sup>4</sup>, Onkar Prasad Garg<sup>3</sup>, Yogendra Singh<sup>1</sup>, Radhey Shyam Sharma<sup>2</sup>, Darshan Singh Bhakuni<sup>3</sup>, Taposh Kumar Das<sup>5</sup>, Sagarika Biswas<sup>1\*</sup>

**1** Department of Genomics & Molecular Medicine, CSIR-Institute of Genomics and Integrative Biology, Delhi, India, **2** Department of Environmental Studies, Delhi University, Delhi, India, **3** Department of Clinical Immunology and Rheumatology, Army Hospital (Research and Referral), New Delhi, India, **4** Department of Orthopaedic, All India Institute of Medical Sciences, New Delhi, India, **5** Department of Anatomy, All India Institute of Medical Sciences, New Delhi, India

## Abstract

Rheumatoid arthritis (RA) is a chronic, autoimmune, systemic and inflammatory rheumatic disease that leads to inflammation of the joints and surrounding tissues. Identification of novel protein(s) associated with severity of RA is a prerequisite for better understanding of pathogenesis of this disease that may also have potential to serve as novel biomarkers in the diagnosis of RA. Present study was undertaken to compare the amount of autoantigens and autoantibodies in the plasma of RA patients in comparison to healthy controls. Plasma samples were collected from the patients suffering from RA, Osteoarthritis (OA), Systemic lupus erythematosus (SLE) and healthy volunteers. The screening of plasma proteins were carried out using 2-dimensional gel electrophoresis followed by identification of differentially expressed protein by MALDI-TOF MS/MS. Among several differentially expressed proteins, transthyretin (TTR) has been identified as one of the protein that showed significantly up regulated expression in the plasma of RA patients. The results were further validated by Western blot analysis and ELISA. In comparison to OA synovium, an exclusive significantly high expression of TTR in RA has been validated through IHC, Western blotting and IEM studies. Most importantly, the increase in expression of TTR with the progression of severity of RA condition has been observed. The autoantibodies against TTR present in the RA plasma were identified using immunoprecipitation-Western methods. The significant production of autoantibodies was validated by ELISA and Western blot analysis using recombinant pure protein of TTR. Hence, these novel observations on increase in TTR expression with the increase in severity of RA conditions and significant production of autoantibodies against TTR clearly suggest that a systematic studies on the role TTR in the pathogenesis of RA is immediately required and TTR may be used as a serum diagnostic marker together with other biochemical parameters and clinical symptoms for RA screening and diagnosis.

**Citation:** Sharma S, Ghosh S, Singh LK, Sarkar A, Malhotra R, et al. (2014) Identification of Autoantibodies against Transthyretin for the Screening and Diagnosis of Rheumatoid Arthritis. PLoS ONE 9(4): e93905. doi:10.1371/journal.pone.0093905

**Editor:** Anthony W.I. Lo, The Chinese University of Hong Kong, Hong Kong

**Received:** December 12, 2013; **Accepted:** March 9, 2014; **Published:** April 8, 2014

**Copyright:** © 2014 Sharma et al. This is an open-access article distributed under the terms of the Creative Commons Attribution License, which permits unrestricted use, distribution, and reproduction in any medium, provided the original author and source are credited.

**Funding:** Financial assistance was partly provided by Indian Council of Medical Research (ICMR) and Council of Scientific and Industrial Research (CSIR), New Delhi, India. The funders had no role in study design, data collection and analysis, decision to publish, or preparation of the manuscript.

**Competing Interests:** The authors have declared that no competing interests exist.

\* E-mail: sagarika.biswas@igib.res.in

## Introduction

Rheumatoid arthritis (RA) is a complex, multifactorial, inflammatory autoimmune disease with the anonymous etiology that leads to cartilage destruction, joint deformation and subsequent loss of multiple joints functions which affects 0.5–1% of population [1], [2]. The disease severity depends on the degree of the inflammation that is characterized by the increase in number of immune cells such as lymphocytes, monocytes and macrophages leading to the production of different immune mediators [3], [4]. Thus, an effective assessment of disease severity is a difficult process in an efficient clinical management of the disease [5]. Diagnosis criteria developed by American College of Rheumatology and European League against Rheumatism are primarily based on clinical symptoms. In the last few years, autoantibody reactivity against autoantigens had been described in RA diagnosis. Anti-cyclic citrullinated peptide (anti-CCP), anti citrullinated protein antibodies (ACPA) and RF factor in the serum of

RA patients have been extensively studied [6]. Autoantibodies have been used as a diagnostic tool for RA, however they lack specificity and sensitivity. So there is an urgent need to investigate more specific disease associated proteins and autoantibodies, which would aid in better understanding of the disease.

Although a great improvement has been made in the management of RA, the mechanism associated with pathology is still remains undefined [7]. In spite of availability of several RA biomarkers, a large number of atypical RA patients dissociate from timely diagnosis and treatment due to limited specificity and sensitivity of the biomarkers. Therefore, identification of specific disease associated protein or specific autoantibodies will be useful in rapid diagnosis of the disease. Thus, the main focus of our study was to identify new proteins, autoantigens and autoantibodies in the sera of RA patients for the better assessment of severity of RA condition that can serve as specific and sensitive biomarker for RA.

**Table 1.** Demographics and clinical assessment scores for the RA, OA, SLE patients and healthy controls.

| S.N. | Characteristics                    | RA (n = 60)                                      |                                                  | OA (n = 34) | SLE (n = 10)                                       | Healthy Control (n = 60) |
|------|------------------------------------|--------------------------------------------------|--------------------------------------------------|-------------|----------------------------------------------------|--------------------------|
|      |                                    | Non severe RA (n = 22)                           | Severe RA (n = 38)                               |             |                                                    |                          |
| 1    | Mean AGE $\pm$ SD                  | 25 $\pm$ 11                                      | 49 $\pm$ 10                                      | 67 $\pm$ 8  | 34 $\pm$ 4                                         | 35 $\pm$ 10              |
| 2    | Mean weight $\pm$ SD               | 54 $\pm$ 10                                      | 55 $\pm$ 10                                      | 60 $\pm$ 15 | 40 $\pm$ 10                                        | 55 $\pm$ 5               |
| 3    | SEX                                | 16F+6M                                           | 32F+6M                                           | 26F+8M      | 10F                                                | 30F+30M                  |
| 4    | Mean Disease Duration(Y)           | 3 $\pm$ 1                                        | 10 $\pm$ 5                                       | 8 $\pm$ 5   | 7 $\pm$ 5                                          | -                        |
| 5    | Mean Serum CRP (mg/liter) $\pm$ SD | 35 $\pm$ 5                                       | 80 $\pm$ 5                                       | 30 $\pm$ 2  | 15 $\pm$ 1                                         | 10 $\pm$ 5               |
| 6    | Mean Tender joint                  | 2 $\pm$ 1                                        | 10 $\pm$ 5                                       | 3 $\pm$ 2   | 3 $\pm$ 1                                          | -                        |
| 7    | Mean Swollen joints $\pm$ SD       | 2 $\pm$ 1                                        | 10 $\pm$ 5                                       | 3 $\pm$ 2   | 2 $\pm$ 1                                          | -                        |
| 8    | RF (IU/ml)                         | 30 $\pm$ 10                                      | 80 $\pm$ 20                                      | 25 $\pm$ 5  | 20 $\pm$ 5                                         | 15 $\pm$ 5               |
| 9    | Mean ESR (mm/hr)                   | 20 $\pm$ 5                                       | 85 $\pm$ 20                                      | 45 $\pm$ 5  | 40 $\pm$ 5                                         | 10 $\pm$ 5               |
| 10   | DAS 28 score $\pm$ SD              | 3 $\pm$ 2                                        | 6.5 $\pm$ 2                                      | -           | -                                                  | -                        |
| 11   | Medicines                          | Mtx, HCQS, Tcz, Aba, Anti TNF-Etn, Anti TNF- lfx | Mtx, HCQS, Tcz, Aba, Anti TNF-Etn, Anti TNF- lfx | NSAIDs      | HCQC, Prednisone, Azathioprine, Cyclophospha- mide | -                        |

RA – Rheumatoid Arthritis, OA – Osteoarthritis, SLE – Systemic lupus erythematosus, SD – Standard Deviation, RF – Rheumatoid Factor, ESR – Erythrocyte Sedimentation Rate, CRP – C Reactive Protein, IU – International Unit, ml – Milliliter, mm – Millimeter, hr – Hour, DAS 28 – Disease Activity Score (maximum 28 joints), F – Female, M– Male, NSAIDs - Nonsteroidal anti-inflammatory drugs. Mtx-Methotrexate, HCQS -Hydroxychloroquine,TCZ- tocilizumab, Aba- Abatacept, Etn-Etanercept, lfx- Infliximab. doi:10.1371/journal.pone.0093905.t001

In the recent years, proteomic techniques like two dimensional gel electrophoresis (2-DE) and matrix-assisted laser desorption/ionization time-of-flight mass spectrometry (MALDI-TOF-MS/MS) are increasingly gaining importance in the field of biomarker discovery and have been used for analyzing serum proteomic spectra [8], [9]. In this study, we compared the serum protein profiles of RA patients and healthy volunteers with an aim to identify RA-associated proteins which can be used for diagnosis of RA. Using 2-DE followed by MALDI-TOF-MS/MS, we observed that TTR was highly expressed protein in the plasma of RA patients. TTR is a major serum thyroid hormone binding protein with a molecular mass of 14 kDa [10] which was formerly known as thyroxine-binding prealbumin protein. It was first recognized to bind thyroxine (T4) in 1958 [11] and subsequently shown that TTR also binds to retinol-binding protein and thus plays a role in the transport of vitamin A [12], [13]. Thus, the name was changed to transthy(roxin)retin(ol) for denoting its dual transport function [14]. Plasma TTR is synthesized by the hepatic parenchymal cells while in fetal life it is synthesized by the yolk sac of endothelium [15]. Further, correlation of TTR expression with the clinical parameters of disease severity in RA patients was carried out. Immunohistochemistry (IHC) and immune electron-microscopy (IEM) were performed to validate the expression of TTR in synovium during the disease conditions. TTR expression profiling was also carried out in the plasma samples of other joint disorders and autoimmune diseases to confirm that TTR is a specific marker for RA.

## Materials and Methods

### Ethics statement

The study protocols were approved by medical ethics committee of Institute of Genomics and Integrative Biology, Delhi University Campus, Mall Road, Delhi, India and Department of Orthopaedic, All India Institute of Medical Sciences (AIIMS), New Delhi, India.

### Sample Collection

In this study, 60 RA, 34 OA and 10 SLE patients showing active disease were enrolled together with sixty healthy control of similar age. Plasma samples from RA (n = 60, Male 12, Female 48), OA (n = 34, Male 8, Female 26), SLE (n = 10, Female 10) and healthy individuals (n = 60, Male 30, Female 30) (Table 1); synovial fluid from RA (n = 6, Male 3, female 3) and OA (n = 6, Male 3, female 3); synovium from RA (n = 7, Male 3, female 4), OA(n = 7, Male 3, female 4) were collected from Indian population in the age range of 25–70 years from AIIMS, New Delhi, India. A detailed medical history of each patient was recorded. Clinical examinations including early morning stiffness along with swelling, tenderness of joints and radiographs depicting erosions and deformities of small and big joints, bilateral pain were recorded under the supervision of rheumatologist. Diagnosis of RA was based on the established criteria given by The American College of Rheumatology/European league, that includes disease activity score (DAS) calculated from online DAS28 tool based on 28 joints count. In this study, all the patients were classified as non severe (DAS score  $\leq$  2.6) or severe (DAS score  $\geq$  5.1) (Table 1). Except for a few non severe cases, all patients were being treated with disease modifying anti-rheumatic drugs (Table 1). Anti-TNF treatment were given to 18 severe patients and 4 non severe patients. Pregnant women, alcoholic patients and patient's having other disease such as diabetes, cardiovascular disease or any other inflammatory disease were excluded from the study. None of the healthy volunteers had previous history of arthralgia, any other chronic diseases or acute infections during the last three months before enrollment. All participants had signed written informed consent before their enrollment.

### Sample preparation

Blood was collected into tubes containing ethylene diamine tetraacetic acid (EDTA). The tubes were centrifuged at 2,000 rpm for 15 min at 4°C, plasma were collected and stored at –80°C.

The biopsy samples of synovium (RA, OA) were collected in Dulbecco's Modified Eagle's Medium (DMEM) having 10% FBS and 1% antibiotics. The synovium were washed several time with PBS and lysed by lysis buffer containing 25 mM tris (pH 8), 1% nonidet P-40, 150 mM NaCl, 1.5 mM EDTA, 0.5% SDS, 1 mM PMSF, 10 mM sodium orthovanadate, 3 mg/ml Aprotinin [16]. The lysed tissue samples were centrifuged at 11,000 rpm for 1 h, supernatant was collected and stored at  $-80^{\circ}\text{C}$  until use.

Synovial fluids were centrifuged at 13,000 rpm for 15 min at  $4^{\circ}\text{C}$  to remove blood contamination. The clear supernatants were treated with hyaluronidase enzyme (Sigma- Aldrich, USA) and the mixture was digested by incubating at  $37^{\circ}\text{C}$  for 4 h. After centrifugation, clear supernatant was stored at  $-80^{\circ}\text{C}$  till further use. The protein concentrations were estimated by the Bradford method (Bio-Rad, USA).

### Two-dimensional gel electrophoresis and gel image analysis

Plasma proteins (150  $\mu\text{g}$ ) were added to the rehydration solution (7 M urea, 2 M thiourea, 2% CHAPS) containing 50 mM DDT and 0.2% ampholyte and applied to the first dimension immobilized pH gradient (IPG) strips (17 cm, pH 4-7, Bio-Rad, USA). First dimension isoelectric focusing (IEF) of the above strips were carried out using Protean IEF cell (Bio-Rad, USA) according to the following protocol: 200 V for 1 h, 500 V for 1 h followed by ramping at 1000 V for 1 h and final focusing at 8000 V for 5 h for a total of 13000 VH (Bio-Rad, USA). After being focused, strips were equilibrated for 20 min in equilibration buffer (50 mM Tris-HCl, pH 8.8, 6 M urea, 4% (w/v) SDS, and 20% (w/v) glycerol) containing 10 mg/ml dithiothreitol (DTT) and then for 20 min in the same equilibration buffer containing 40 mg/ml iodoacetamide (IAA) instead of DTT. Second dimension sodium dodecyl sulfate polyacrylamide gel (12%) electrophoresis (SDS-PAGE) was performed to resolve the proteins on the basis of molecular mass along with broad range pre-stained markers (Biolinkk India, New Delhi). Similarly, samples were prepared and separated from blood obtained from healthy control subjects. Gels were stained using ammonical silver nitrate (Merck Chemicals, Germany) and stained gels were scanned in 16 bit grey scale Tiff-images with an Alpha Digidoc 1201 scanner [17].

### In gel digestion of proteins and extraction of peptides

Proteins were extracted by digesting the gel spots using trypsin gold (Promega, USA), washed with distilled water, excised in 1 mm cubes and destained with 50  $\mu\text{l}$  of 1:1 solution of 30 mM potassium ferricyanide (Sigma-Aldrich, USA) and 100 mM sodium thiosulphate (Sigma-Aldrich, USA). The gel pieces were washed and dehydrated by incubation with 40  $\mu\text{l}$  of 1:1 acetonitrile (ACN)/water for 15 min followed by washing with 40  $\mu\text{l}$  of ACN until they become white and sticky. The gel pieces were then equilibrated for 5 min by adding 50  $\mu\text{l}$  of 100 mM ammonium bicarbonate followed by addition of 50  $\mu\text{l}$  ACN (Sigma-Aldrich, USA). The solutions were discarded after 15 min. Gel pieces were dehydrated in a vacuum centrifuge, digested by adding 10  $\mu\text{l}$  of trypsin (0.1  $\mu\text{g}/\mu\text{l}$  trypsin, Promega, USA) in trypsin digestion buffer and incubated for 45 min in ice. The solutions were discarded after incubation and 25-60  $\mu\text{l}$  of trypsin digestion buffer (5  $\mu\text{l}$  of 1 M  $\text{CaCl}_2$ , 25  $\mu\text{l}$  of 1 M  $\text{NH}_4\text{CO}_3$  and 970  $\mu\text{l}$  distilled water) was added and incubated overnight at  $37^{\circ}\text{C}$ . The supernatants were collected and dried in vacuum centrifuge. The peptides were extracted from gel pieces by varying the concentration of ACN and trifluoroacetic acid (TFA, Sigma-Aldrich, USA), sonicated in a water bath for 30 min, dried in

speed-vac to remove TFA/ACN and stored at  $-20^{\circ}\text{C}$  till further use [18].

### Matrix-assisted laser desorption ionization-MS/MS

MALDI-TOF MS/MS (Applied Biosystems, Life Technologies, USA) was utilized to determine the molecular masses of polypeptides. ZipTip C4 was used for the desalting and purification of extracted peptides. One microliter of peptide extract was mixed with 1  $\mu\text{l}$  sinapinic acid matrix onto the MALDI target plate and allowed to air dry. MS/MS spectra were acquired across the mass range of 10,000–20,000 Da in reflector positive mode with 5600 laser shots intensity (25 Shots/Sub-Spectrum for 500 total Shots/Spectrum). The internal calibration was performed using standard calibration mix 5 (Applied Biosystems). For the MS/MS precursor selection, minimum S/N (signal/noise) filter was set at 25 with an exclusion list for  $\alpha$ -Cyano-4-hydroxycinnamic acid (CHCA) matrix peaks. Protein identifications were accepted with a statistically significant probability based Mowse score ( $p \leq 0.05$ ). Proteins with at least 2 peptides that were unique to the specific protein were only considered.

### Western blot analysis

Hundred micrograms of plasma protein from RA ( $n = 12$ ) and control ( $n = 12$ ) was subjected to 12% SDS-PAGE. Proteins were transferred to the nitrocellulose membrane (Millipore, USA) using Western-Blot technique followed by blocking using 5% bovine serum albumin (BSA, Sigma-Aldrich, USA) for 1 h at room temperature (RT) with gentle shaking. The membranes were then incubated with anti-TTR (ProSci, USA) antibody (1:1000 dilutions) for 1 h followed by the incubation of membranes with HRP conjugated anti-mouse antibody at RT with mild shaking. Enhanced chemiluminescence assay (ECL) (Thermo Scientific, Pierce, USA) was used to develop the membrane and autoradiographed on high performance chemiluminescence film (GE Healthcare) according to the manufactures guidelines. After each step the membrane was washed with 1X PBS [19].

Similar experiment was carried out using synovium (RA,  $n = 7$ ) (OA,  $n = 7$ ) and synovial fluid (RASF,  $n = 6$ ) (OASF,  $n = 6$ ) of RA and OA patients. Proteins (50  $\mu\text{g}$ ) of synovium homogenate and synovial fluid were loaded separately in SDS-PAGE and transferred on to nitrocellulose membrane. The anti-TTR and anti-mouse antibodies were used as a primary and secondary antibody respectively.

### ELISA validation

ELISA was carried out using commercially available anti-TTR monoclonal antibody (ProSci Antibody, USA). For comparison between patient and control group, 60 plasma samples from each group were taken. Individual plasma samples from the enrolled participants were diluted (1  $\mu\text{l}/200 \mu\text{l}$ ) in a coating buffer (0.01 M  $\text{Na}_2\text{CO}_3$  and 0.035 M  $\text{NaHCO}_3$ , pH 9.6), coated on 96 well plates (Thermo Scientific, Nunc, USA) and incubated overnight at  $4^{\circ}\text{C}$ . Next day the plates were washed three times with 100  $\mu\text{l}$  PBST and incubated with 100  $\mu\text{l}$  blocking buffer (1% BSA in 1X PBS) for 1 h at RT. The blocking buffer was extracted, plates were washed and incubated with 100  $\mu\text{l}$  of anti-TTR as a primary antibody (1:2000 dilution) for 2 h at RT. The plates were then washed three times and incubated with 100  $\mu\text{l}$  of anti-mouse HRP conjugate (1:1000 dilution) for 1 h and developed with ortho phenylene diamine (1 mg/ml in 0.05 M citrate buffer and 5  $\mu\text{l}/\text{ml}$   $\text{H}_2\text{O}_2$ , Sigma-Aldrich, USA). The reactions were stopped by adding 2N  $\text{H}_2\text{SO}_4$  in each well and binding efficiency was checked by reading absorbance at 492 nm in an ELISA reader (Spectramax Plus; Molecular Devices, USA) [20]. Plasma levels

of TTR in RA patients was also compared from patients of different diseases.

### Immunohistochemistry of synovial tissue

To validate the expression of TTR in synovial tissue (RA, n = 3 and OA, n = 3), the tissues were fixed in formalin (10%) and subjected to immunohistochemical analysis. Briefly, the tissue sections were paraffin-embedded and cut into a desired thickness (5  $\mu$ m) using microtome. The slides were placed in a container, submerged in citrate buffer (pH 6.0) and incubated at 40°C for 2 min periods repeatedly for three times and then finally kept for 20 min in microwave. The sections were then allowed to equilibrate at RT in the buffer, and rinsed with distilled water. The anti-TTR antibody (ProSci, USA) was applied to the sections at a 1:400 dilution for overnight incubation at 4°C. Anti-mouse HRP conjugated was used as a secondary antibody (1:200 dilutions) for 2 h. The sections were counterstained in hematoxylin followed by freshly prepared 3,3'-diaminobenzidine (DAB, Sigma-Aldrich, USA). The slides were then mounted with cover slip and observed under microscope [21].

### Immuno-electron microscopy

To further validate the expression of TTR in synovial tissues, the ultrathin sections of the tissues were subjected to immuno-electron microscopy analysis. The RA (n = 3) and OA (n = 3) tissue samples were fixed in 0.5% glutaraldehyde and 2% paraformaldehyde solution for 8 h at 4°C. After three times washing with 0.1 M phosphate buffer, the tissue samples were gradually dehydrated, in-filtered and embedded in London Resin White (TAAB, UK). Blocks were cured at 65°C for 72 h and made ultra-thin sections (ranges 60-90 nm) with Leica Ultra-cut UC6 ultra microtome (Leica-Microsystems, USA). Sections were incubated for 1 h with 2% skimmed milk and intermittent washing was done with distilled water. Sections containing grids were incubated with primary anti-TTR antibody (1:200 dilutions, ProSci Antibody, USA) at 4°C overnight. Finally sections were washed with 1% fish gelatin in sodium phosphate buffer and incubated with 1:100 dilutions gold conjugated secondary antibody (TAAB, UK) at RT for 2 h. The grids were stained with 2% aqueous uranyl acetate (Merck Chemical, Germany) and analyzed under electron microscope (FEI Tecnai G<sup>2</sup> Spirit) at 200 kV [22],[23].

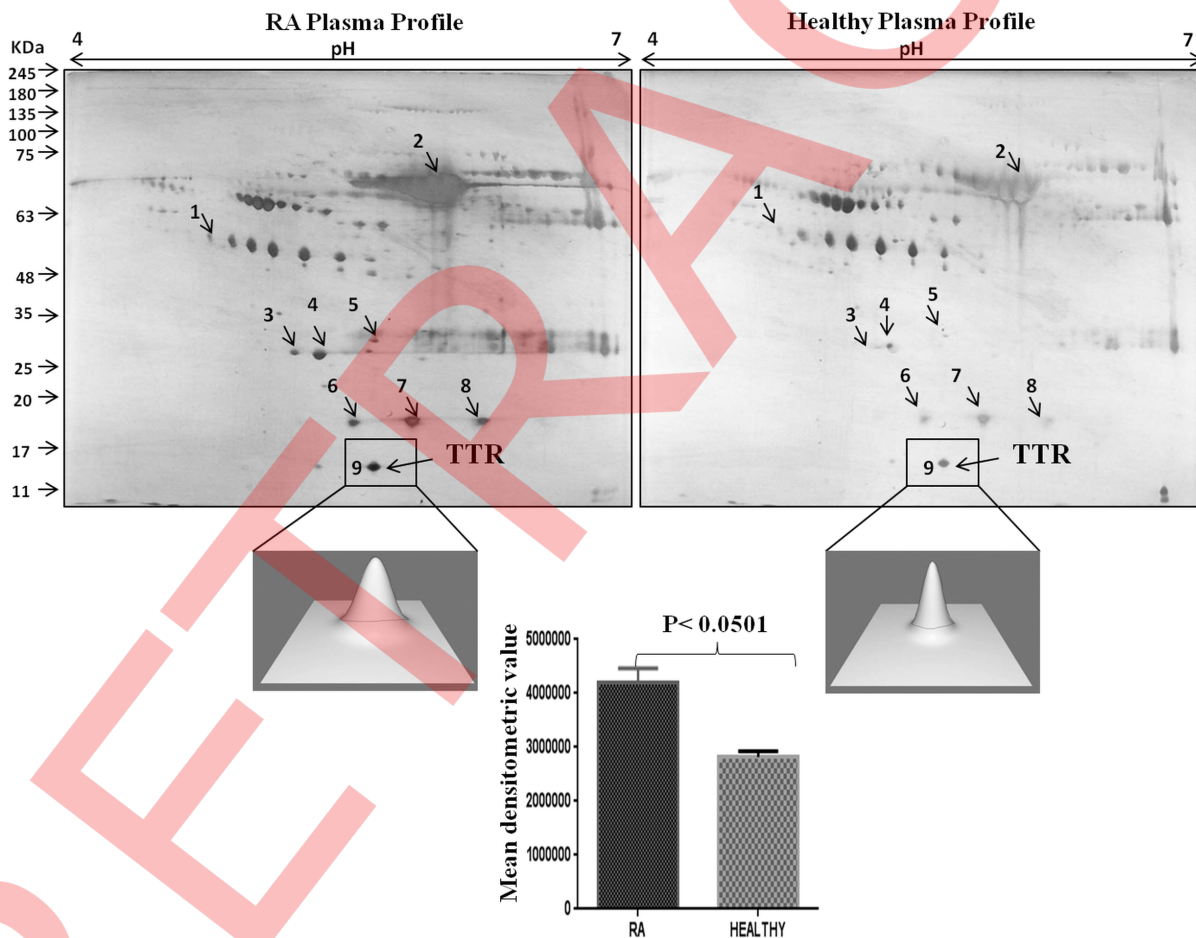

**Figure 1. Two dimensional gel electrophoresis of plasma proteins.** A representative silver stained 2-DE gel image of plasma proteins from three sets of samples from RA and controls patients. The gels were analyzed for differential expression of proteins using PD-Quest software. The lower panel showed 3D view of TTR expression and their densitometric analysis demonstrated 1.4 fold elevated expression of TTR in RA as compared to healthy control.

doi:10.1371/journal.pone.0093905.g001

**Table 2.** List of differentially expressed proteins in plasma of RA patients with respect to healthy control.

| Spot No. | Protein identified     | Accession No. | M.W.(Da)/PI calculated | Peptide matched | Biological Functions                                                                                   |
|----------|------------------------|---------------|------------------------|-----------------|--------------------------------------------------------------------------------------------------------|
| 1        | Haptoglobin beta chain | P00738        | 45,205/6.13            | 11              | Cellular iron ion homeostasis, Defence response to bacterium, Intestinal permeability                  |
| 2        | Human Serum Albumin    | P02768        | 69,366/5.92            | 12              | Regulation of the colloidal osmotic pressure of blood, Bile salts transport, Lipid metabolism          |
| 3        | Serum amyloid protein  | P02743        | 26,246/5.97            | 6               | Acute phase inflammation, Transport of cholesterol                                                     |
| 4        | Apolipoprotein A 1     | P02647        | 30,778/5.56            | 11              | Cholesterol transport, Fat efflux from tissue                                                          |
| 5        | Alpha-1 Microglobulin  | P02760        | 38,999/5.95            | 9               | Cell adhesion, Heme Catabolism, Regulation of Immune response                                          |
| 6        | HP alpha 2 chain       | P00738        | 16,330/6.1             | 6               | Associated with higher serum iron, Decreased antimicrobial and antioxidant capability, Antigen binding |
| 7        | HP alpha 2 chain       | P00738        | 16,330/6.1             | 12              | Antigen binding, Defence response                                                                      |
| 8        | HP alpha 2 chain       | P00738        | 16,330/6.1             | 12              | Intestinal permeability, allowing intercellular tight junction disassembly                             |
| 9        | Transthyretin          | P02766        | 15,887/5.49            | 9               | Transport, Retinol metabolic process, Phototransduction, extracellular matrix organization             |

M.W. – Molecular Weight, PI – Isoelectric Point.  
doi:10.1371/journal.pone.0093905.t002

### Detection of autoantibodies by immunoprecipitation-Western blotting

To ascertain the significance of increase level of TTR in the diagnosis of RA, autoantibodies in the plasma of RA patients and healthy individuals were detected using immunoprecipitation-Western blotting methods. Immunoprecipitation (IP) was performed using Catch and Release v2.0 reversible immunoprecipitation system (Millipore, USA) as per manufacturer's instructions. Briefly, plasma proteins (500 µg) of individual RA patients was incubated for 2 h in mild shaking condition at RT with anti-TTR antibody separately along with 10 µl antibody capture affinity ligand buffer. The antigen-antibody complexes were eluted with 70 µl elution buffer and separated on 12% SDS-PAGE. Proteins were transferred to nitrocellulose membrane (Millipore, USA) and blocking was carried out using 5% bovine serum albumin (BSA) for 1 h at RT with gentle shaking. Plasma of RA and healthy individuals was added to the membrane as a primary antibody for overnight incubation at 4°C. After each step, the membrane was washed with PBST. The membrane was then incubated with HRP conjugated anti-human antibody for 1 h at RT with mild shaking. Enhanced chemiluminescence assay (ECL) (Thermo-Scientific, Pierce, USA) was used to develop the membrane and autoradiographed on high performance chemiluminescence film (GE Healthcare).

### Validation of autoantibodies against transthyretin in the plasma of RA, OA and healthy individuals by ELISA using recombinant pure protein

Each well of the 96 well microtiter plates (Thermo-Scientific, Nunc, USA) were coated with purified recombinant TTR protein having concentration (0.20 µg/100 µl buffer containing 0.01 M Na<sub>2</sub>CO<sub>3</sub> and 0.035 M NaHCO<sub>3</sub>, pH 9.6). The plates were kept at 4°C for 24 h, washed three times with 200 µl PBST and incubated with 200 µl blocking buffer (2% BSA in PBS) for 2 h. The blocking buffer was discarded, washed and incubated with 100 µl plasma of RA, OA and healthy individuals (1:250 dilution) for 3 h at RT. The plates were then washed (three times) and incubated with 100 µl of anti-human HRP conjugate for 1 h and developed

with ortho-phenylene diamine (1 mg/ml in 0.05 M citrate buffer and 5 µl/ml H<sub>2</sub>O<sub>2</sub>) for 30 min. The reactions were stopped by adding 2N H<sub>2</sub>SO<sub>4</sub> to each well and the binding efficiency was checked by reading absorbance at 492 nm in an ELISA reader (Spectramax Plus; Molecular Devices, USA).

### Invitro validation

To validate the increased level of TTR in vitro conditions, the hepatocellular carcinoma (HepG2) cell lines were challenged with *E. coli* LPS for inflammation and level of TTR expression was determined. HepG2 cell line was maintained as sub confluent monolayer in Dulbecco's modified eagles's medium (DMEM, Invitrogen, USA) with 10% fetal bovine serum (HyClone, Logan, USA) and 100 units/ml penicillin plus 100 µg/ml streptomycin (Life Technology, Invitrogen, USA) in humidified chamber at 37°C with 5% CO<sub>2</sub>. The culture was allowed to grow to confluence and used for further experiments. Viability of the cells was determined by the Trypan blue (0.4% Trypan blue in PBS) exclusion method. The cells were challenged with different concentrations of lipopolysaccharide (LPS, Sigma-Aldrich, USA) of *Escherichia coli* and LPS concentration was optimized for inducing measurable concentration of nitrite with minimum cytotoxicity.

The MTT assay was performed to check the cell viability in a 96 well plate. The cells were treated with different concentrations of LPS. At the end of each experiment, the cells were incubated with MTT (20 µl of 5 mg/ml per well, Sigma-Aldrich, USA) at 37°C for 4 h. The formazan product was solubilized by the addition of 100 µl of 0.1N HCl in isopropanol. Cell viability was estimated by recording the absorbance at 595 nm in an ELISA plate reader (data not shown).

### Statistical Analysis

Statistical analysis was performed using Windows GraphPad Prism 5 (GraphPad Software, La Jolla, California, USA). Comparisons in expression TTR between healthy control and diseased groups were performed using the two tailed paired *t*-test, and for comparison between more than two groups two tailed

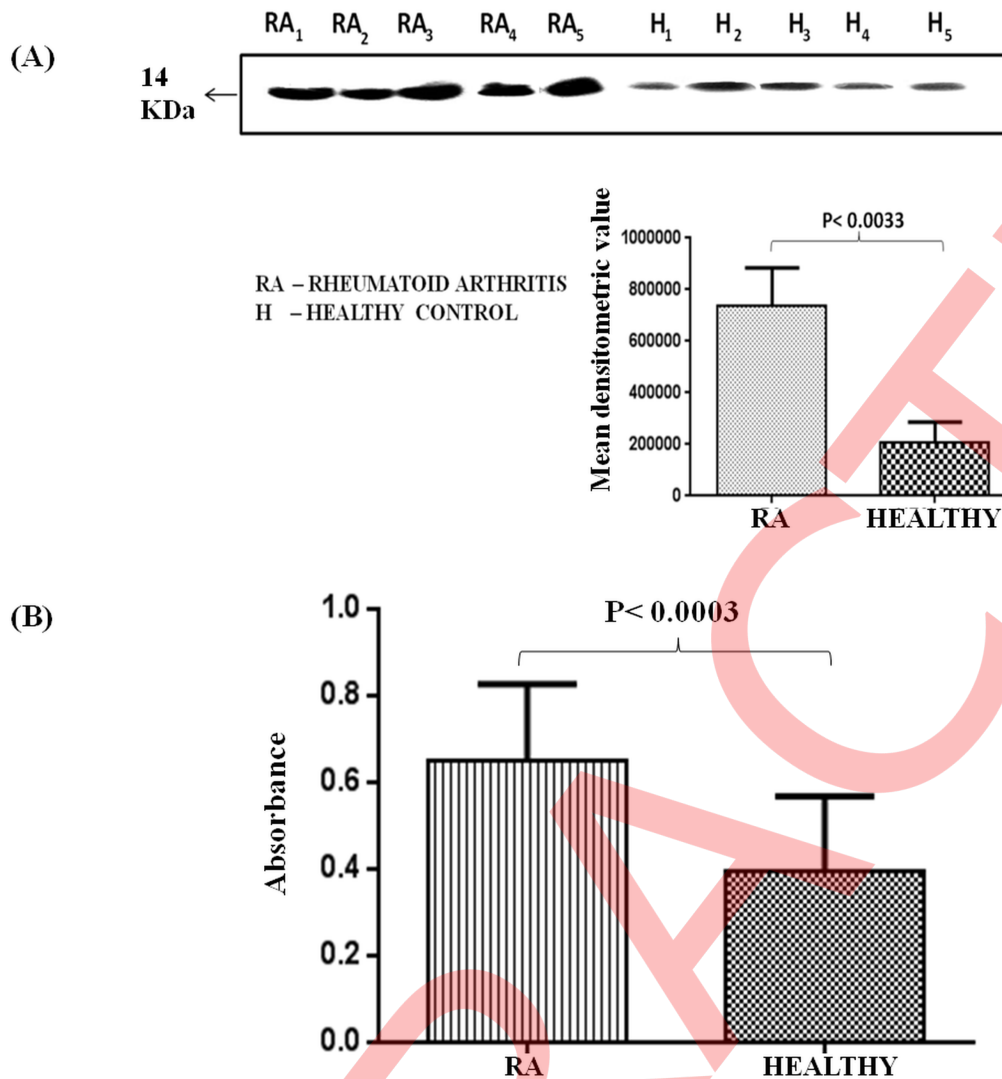

**Figure 2. Expression analysis of TTR in the plasma of RA.** (A) Western blot was performed using plasma proteins of RA patients ( $n = 12$ ) and healthy controls ( $n = 12$ ). Densitometric analysis of band developed for TTR followed by statistical analysis using paired two tailed  $t$ -test showed 3.6 fold elevated expression of TTR in RA as compared to healthy controls. (B) ELISA of TTR in the plasma of RA patients ( $n = 60$ ) and controls ( $n = 60$ ) indicated 1.6 fold increased expression of TTR in the plasma of RA. doi:10.1371/journal.pone.0093905.g002

unpaired one-way ANOVA were used. Results were considered statistically significant if  $p < 0.05$ .

## Results

### Identification of differentially expressed proteins

Two-dimensional gel electrophoresis coupled with MALDI-TOF MS/MS analysis was carried out to identify the differentially expressed proteins in RA patients. The PD-Quest software analysis of 2-DE gels displayed 119 spots in RA sera and 96 spots in healthy sera. Out of 23 differential protein spots, 9 protein spots were successfully identified by MALDI-TOF MS/MS [Table 2]. The identified proteins included haptoglobin ( $\beta$ -chain), haptoglobin alpha 2 chain, alpha 1 microglobulin, serum amyloid, albumin and apolipoprotein which were upregulated in the sera of RA patients as compared to healthy control. One of the protein, identified as TTR also exhibited elevated levels in sera of RA patients as compared to other proteins. PD-Quest and densitometry analysis showed 1.4 fold higher expression of

TTR in RA patients as compared to healthy volunteers (Figure 1 and S1).

### Validation of elevated expression of TTR in plasma, synovium and synovial fluid

The significant increase in expression of TTR in plasma, synovium and synovial fluid has been validated using Western blotting, ELISA, immune-histochemical and immuno-electronmicroscopic analysis. Among all the identified proteins in plasma of RA patients, TTR was found to be associated with inflammation [24] and was validated in healthy controls and RA patients using Western blot analysis. The densitometric analysis of Western blots performed (Figure 2A) with plasma of severe RA patients ( $n = 12$ ) showed 3.6 fold higher TTR levels in RA patients as compared to healthy control ( $n = 12$ ). Levels of TTR was also analyzed by ELISA and found to be elevated (1.6 fold) in RA patients ( $n = 60$ ) as compared to the healthy controls (Figure 2B).

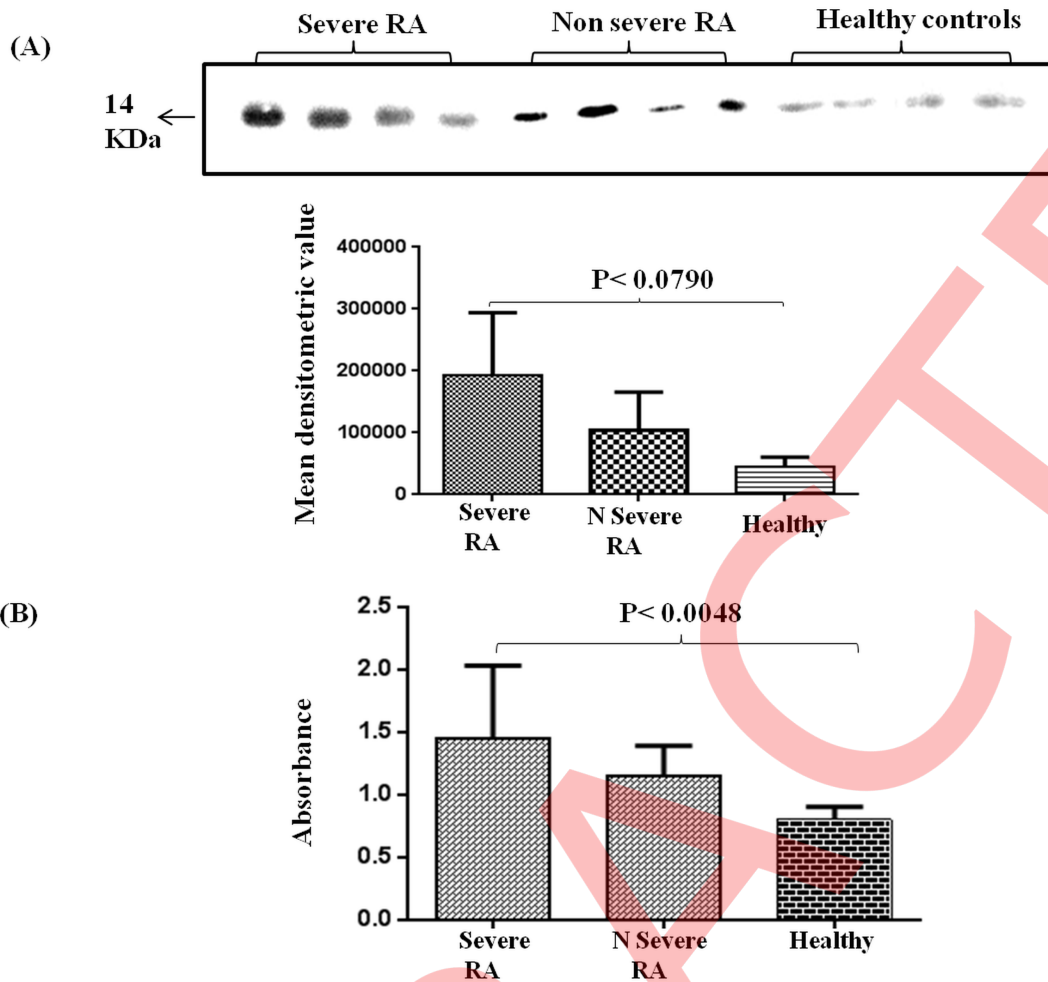

**Figure 3. Expression of TTR in plasma of severe and non severe RA and healthy control.** (A) Western blot analysis of plasma obtained from severe (n=28), non severe (n=22) and healthy control (n=25) revealed 4.75 fold and 2.5 fold increased expression of TTR in severe and non severe RA patients respectively as compared to healthy controls. (B) ELISA of TTR in severe and non severe samples was performed and compared with healthy controls. TTR expression was significantly up regulated ( $p < 0.0048$ ) in severe and non severe RA patients as compared to healthy control (2.0 fold and 1.5 fold respectively). doi:10.1371/journal.pone.0093905.g003

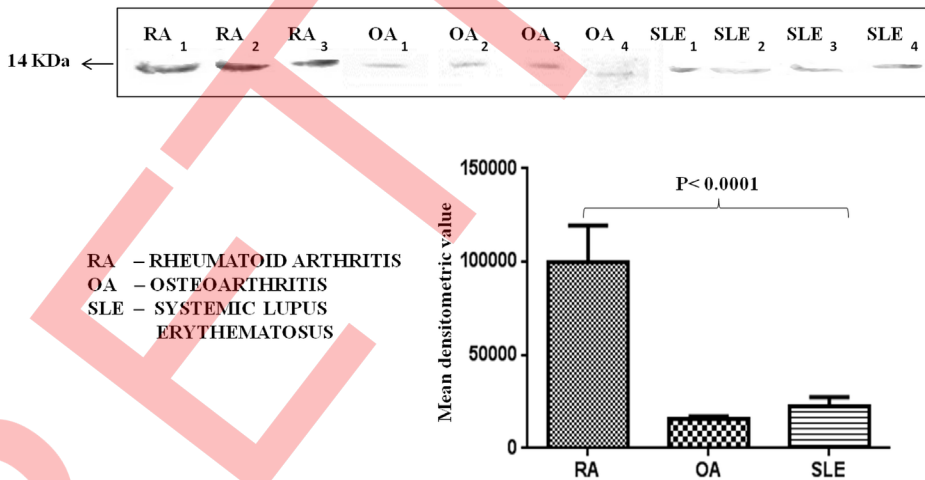

**Figure 4. Expression of TTR in RA, Osteoarthritis and Systemic lupus erythematosus patients.** TTR expressions were examined in other joint disease and autoimmune disease such as OA and SLE. Western blot analysis showed that TTR level was significantly down regulated ( $p < 0.0001$ ) in the plasma of OA and SLE patients as compared to the RA patients. Densitometric analysis indicated 6.6 and 5 fold higher expression of TTR in RA (n=9) as compared to OA (n=12) and SLE (n=12) respectively. doi:10.1371/journal.pone.0093905.g004

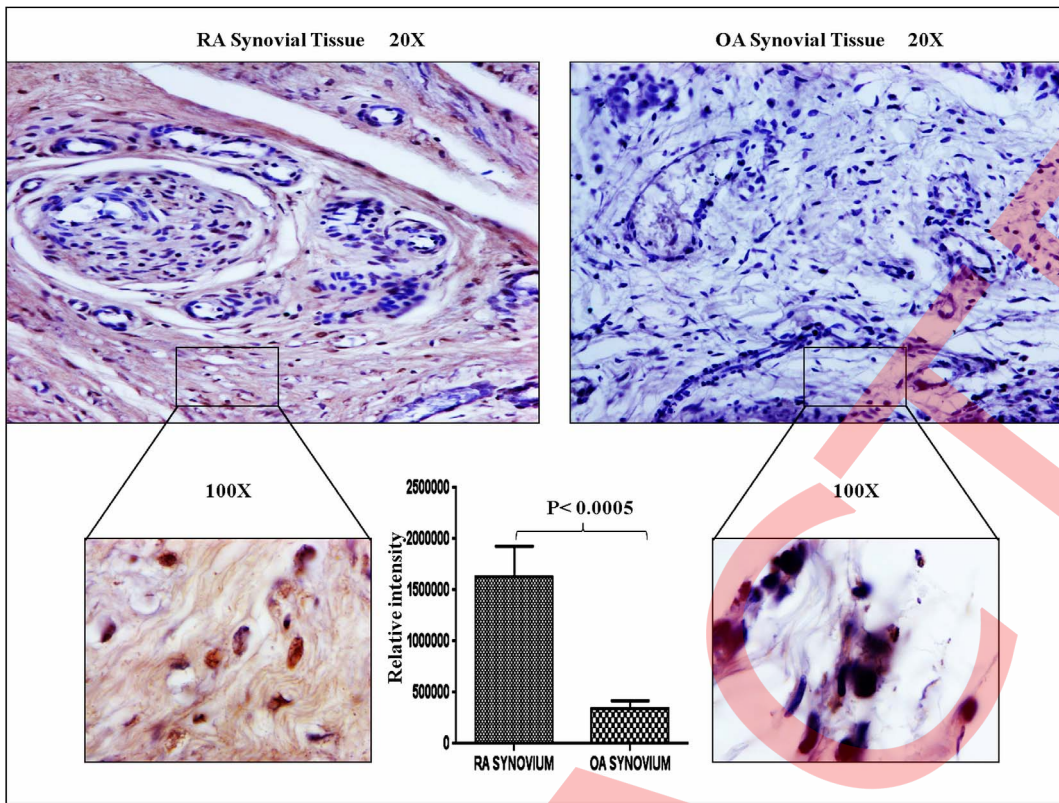

**Figure 5. Immunohistochemistry of synovium.** To observe the expression of TTR in synovium (RA, n = 3 and OA, n = 3), IHC were performed. Tissue samples were fixed, processed and stained with DAB. Brown colour indicates the presence of autoantigen in synovium. Upper panel shows the image of synovial tissue at 20X and lower panel shows the image at 100X magnification. TTR expression was predominantly high in RA as compared to OA synovium. Densitometric analysis revealed approximately 5 fold up regulation of TTR expression in RA synovium as compared to OA. doi:10.1371/journal.pone.0093905.g005

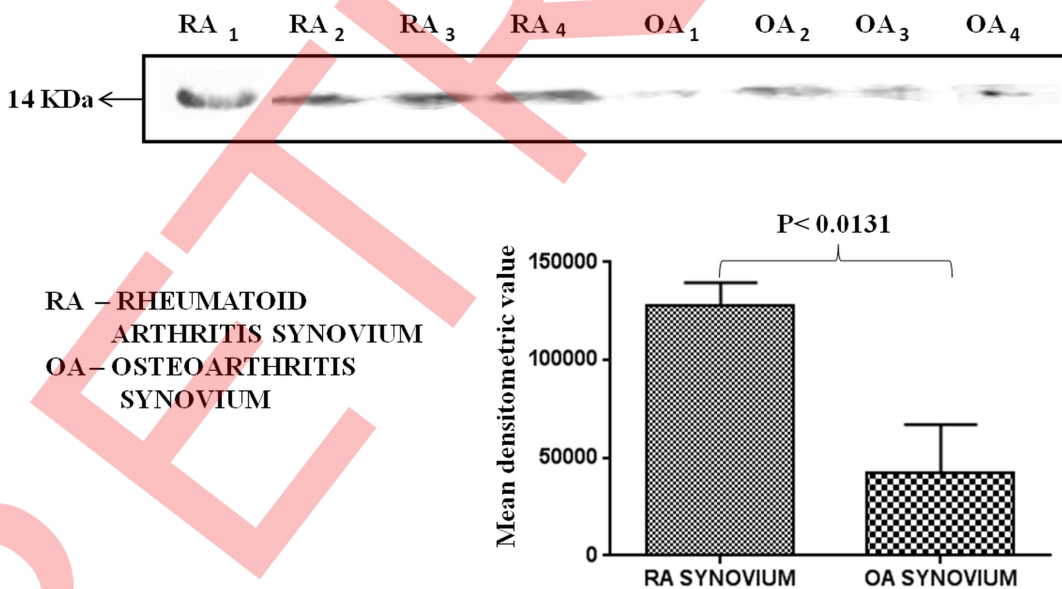

**Figure 6. Quantitation of TTR in synovium by Western blotting.** Protein (50  $\mu$ g) of RA synovium (n = 7) and OA synovium (n = 7) was loaded in SDS-PAGE gels, the proteins were separated and transferred onto nitrocellulose. Western blot results revealed 3.2 fold higher expression ( $p < 0.0131$ ) of TTR in RA synovium as compared to OA synovium. doi:10.1371/journal.pone.0093905.g006



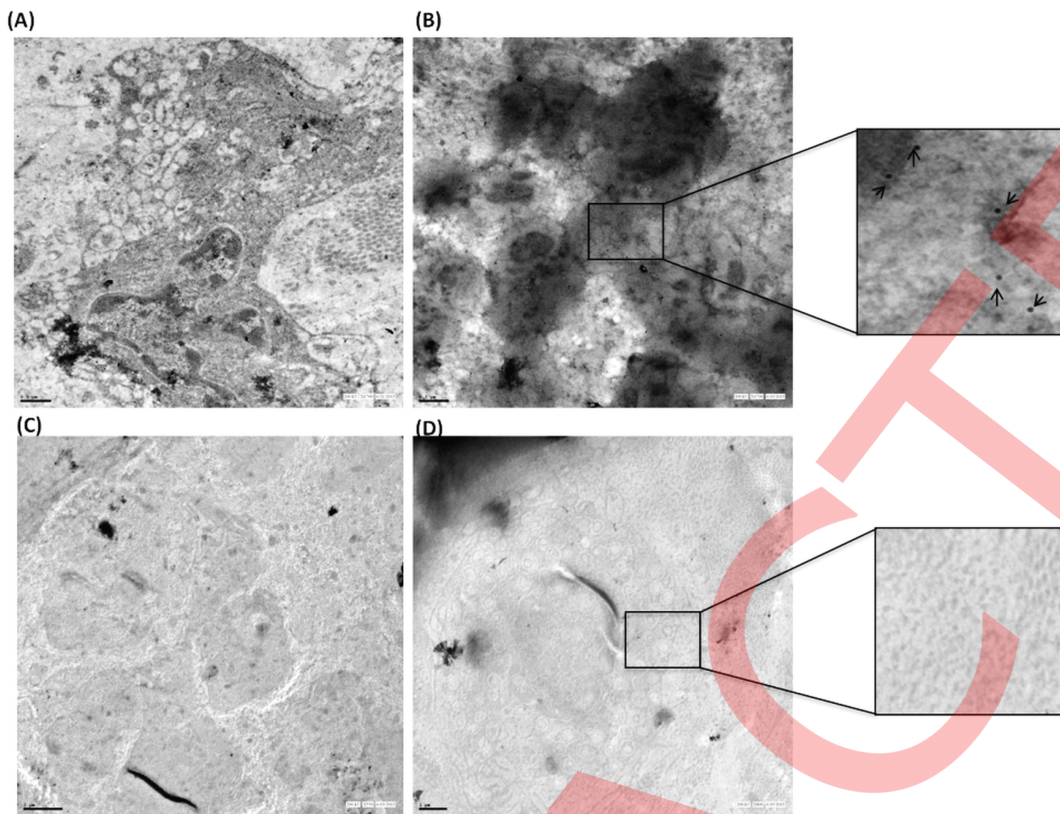

**Figure 7. Quantitation of TTR in synovium by immunoelectron microscopy.** RA ( $n = 3$ ) and OA ( $n = 3$ ) synovium were surgically removed in aseptic condition, fixed and processed for electron microscopy. Ultrathin sections were labelled with 20 nm gold conjugated secondary antibody. Upper panel (A) shows evenly distributed gold label in RA synovium (B) Selected area has been magnified and marked with arrows to show the gold labelling. Lower panel (C, D) shows the negligible level of TTR expression in OA synovium (Scale bar A, B, D 1  $\mu\text{m}$ , C 2  $\mu\text{m}$ ). doi:10.1371/journal.pone.0093905.g007

The expression analysis among the RA population suggested that 71% patients exhibit statistically significant upregulation of TTR in RA patients, whereas, 15% patient population showed similar levels of TTR as observed in healthy controls (Figure S2). These results suggest that TTR may be a disease associated protein. This data led us to analyze if the TTR expression is dependent on the disease severity as well. To answer this, we segregated the patient population in terms of their respective disease severity and then analyzed the TTR expression in the patient groups.

Based on DAS score, the RA patient population was segregated into two groups, severe (DAS score  $\geq 5.1$ ) and non-severe (DAS score  $\leq 2.6$ ) population. Interestingly, both Western blotting and ELISA analysis confirmed that there is a significant increase in expression of TTR in the plasma as per increase in severity of RA conditions of patients. TTR expression was analyzed in plasma of severe ( $n = 28$ ), non-severe ( $n = 22$ ) RA and healthy control ( $n = 25$ ) groups by Western blot. Densitometry analysis revealed that TTR expression was 4.75 fold and 2.5 fold higher in severe and non-severe RA patients respectively in comparison to healthy controls (Figure 3A). The observation was then validated by ELISA that showed TTR expression increases with the progression of disease severity. ELISA result demonstrated that TTR expression in severe RA condition was up regulated by 2.0 fold and 1.5 fold in severe and non-severe RA patients ( $p < 0.0048$ ) in comparison to healthy control (Figure 3B).

To prove the specificity of TTR for RA diagnosis, it was necessary to measure the TTR levels in patients of other joint

disease and autoimmune diseases such as OA and SLE. It was interesting to note that the levels of TTR was 6.6 fold and 5 fold more in the plasma of RA patients as compared to OA and SLE respectively (Figure 4).

We observed that TTR protein was up regulated in plasma samples of RA patients. Therefore, it was intriguing to investigate the status of TTR expression in RA synovium and synovial fluid. Immunohistochemistry, Western blotting and IEM were performed to check the level of TTR in RA synovium as compared to OA synovium. As shown in Figure 5, TTR was predominantly expressed ( $p < 0.0005$ ) in RA synovium, whereas, TTR amount was negligible in OA synovium. The relative intensity as calculated by using Alpha Digidoc 1201 software that showed significantly higher expression ( $\sim 5$  fold) of TTR in RA synovium as compared to OA synovium. To further validate the IHC result, Western blotting was carried out using RA and OA synovium. The results indicated 3.2 fold elevated expression of TTR in RA synovium as compared to OA (Figure 6) and these observations were similar to the results we observed with the plasma of RA patients. We also measured the TTR expression in synovial fluid of RA and OA samples (control) and found the similar trend showing up regulation of TTR in RA synovial fluid (Figure S4) which confirmed the significance of such an increase in TTR expression especially in RA conditions.

Immunoelectron microscopy analysis confirmed that as compared to synovium of OA patients, there is significantly high global expression of TTR in synovium of RA patients. Immunoelectron microscopy using gold labelled anti-TTR antibodies (20 nm)

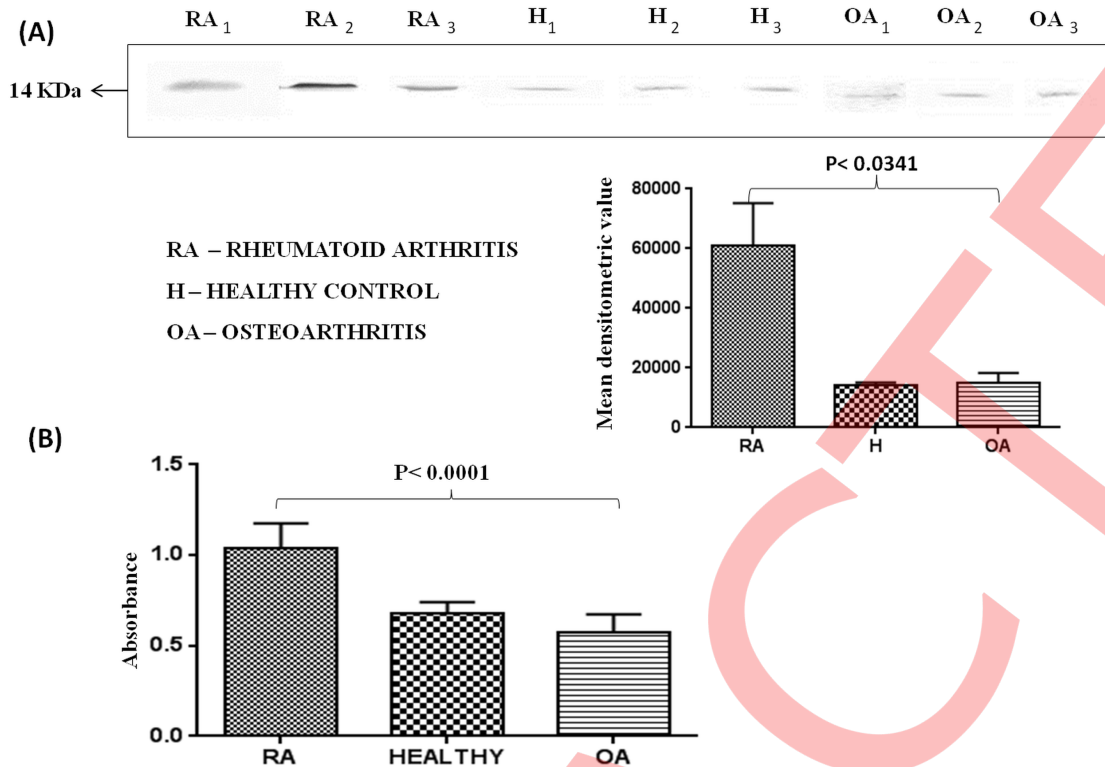

**Figure 8. Quantitation of autoantibodies against TTR in plasma of RA, OA patients and healthy controls.** (A) TTR was immunoprecipitated using anti-TTR antibody and separated on SDS-PAGE and Western blotting was performed. Autoantibodies against TTR in RA ( $n = 30$ ) were approximately 5 fold higher as compared to healthy control ( $n = 30$ ) and OA ( $n = 34$ ) patients. Each bar represents the mean  $\pm$  SD of values obtained from densitometric analysis of bands. (B) Expression of autoantibodies against TTR in RA was further confirmed by ELISA and analysis showed 1.6 and 2 fold higher levels of autoantibodies in RA as compared to healthy control and OA respectively. doi:10.1371/journal.pone.0093905.g008

showed that TTR was predominantly present in RA synovium as compared to OA synovium (Figure 7). The expression of TTR was observed in extra-cellular matrix as well as inside the synovial cells of RA patients. The TTR labeling demonstrates higher expression in the RA synovium, while it was not detected in OA patient's synovium.

*In vitro* experiment was performed to see the effect of inflammation on TTR level and the inflammation was induced in HepG2 cells by LPS of *E.coli*. TTR level was analyzed in the LPS stimulated culture supernatant and compared with the supernatant obtained from unstimulated cells. TTR level was found to be higher in the LPS treated supernatant as compared to the untreated cells (Figure S3).

#### Identification of autoantibodies against TTR

As compared to health individuals, there has been a several fold high induction of autoantibodies production in RA plasma. Antibodies against TTR were assayed in the plasma of RA ( $n = 30$ ), OA ( $n = 34$ ) and healthy control ( $n = 30$ ) groups using the immunoprecipitation method followed by Western blotting (Figure 8A). It was found that autoantibodies against TTR were 5 fold higher in RA plasma as compared to OA and healthy subjects. Autoantibodies against TTR were also found using recombinant pure protein of TTR in Western blot analysis (data not shown). The quantification of autoantibodies against TTR was done by ELISA which indicated that the level of autoantibodies was 1.6 fold and 2 fold higher ( $p < 0.0001$ ) in RA sera as compared to healthy control and OA respectively (Figure 8B).

#### Discussion

The key to early recognition of autoimmune disease lies within the humoral system. To date, a variety of candidate disease-associated proteins (autoantigen) and autoantibodies have been found to play an important roles in the pathogenesis of RA [25], [26], [27]. Proteomic pattern analysis is one of the most promising approaches for the discovery and identification of proteins associated with diseases [28], [29], [30], [31], [32]. Therefore, the present study was based on the screening of proteins present in the sera of RA patients for the identification of proteins associated with severity of diseases and have potential for diagnosis. Proteomic approach is used to investigate differentially expressed proteins in the plasma of RA patients. In this study, nine differentially expressed proteins were identified in RA patients in comparison to healthy control using MALDI TOF-MS/MS suggesting that many proteins are associated with RA. Some of these proteins such as apolipoprotein, albumin, heptoglobulin beta chain are already known to be involved in the development of RA [8], [33], [34]. Recently, significantly higher level ( $p < 0.05$ ) of TTR in RA plasma compared to healthy control has been reported, however, their role in the pathogenesis of RA is not understood. In addition, no statistical significant expression of TTR between OA and healthy control ( $p > 0.05$ ) has been reported [35].

In the present study, among all the identified proteins TTR autoantigen was found to be over expressed in the plasma, synovium and synovial fluid of RA patient. TTR protein has also

been suggested as a possible biomarker in other diseases such as ovarian cancer [36], hepatocellular carcinoma [37], malnutrition [38] and mycosis fungoides [39].

To assess the TTR expression profile for joint diseases, OA and SLE in addition to RA patients were included in this study. Plasma TTR expression was significantly down regulated in OA and SLE patients as compared to RA patients. Thus, it can be conveniently considered that expression of TTR protein is not affected in all the joint diseases and due to inflammation in general except in RA. One of the important observations of this study includes demonstration of increase in expression of TTR with the increase in severity of RA. Such an association of TTR with severity of RA has not been previously shown. Although very recently there has been a report on elevated expression of TTR in RA sera samples [35] but no information is available on the expression of TTR with severity of RA conditions. We found that TTR level was influenced with the severity of the disease (Figure 3). In addition, our study further demonstrated that the TTR expression profiling in RA and OA synovium samples using IHC and Western blotting that was further confirmed by IEM. These findings revealed that TTR was significantly over expressed in RA synovium whereas moderate expression has been observed in OA synovium. The IEM study demonstrated the higher levels of TTR in RA synovium and it showed both cytosolic and nuclear localization. The study was extended by performing an *in vitro* experiment using HepG2 cell line in which the inflammation was induced by bacterial LPS and the TTR levels were measured in the medium. Such a comprehensive study on expression of proteins involving plasma, synovium and synovial fluid was lacking. Therefore, the observation on increase in expression of TTR with the increase in severity of RA has a merit in RA pathogenesis and etiology.

The present study has also demonstrated that the autoantibodies against TTR are over expressed in RA patients. This over expression was demonstrated using Western blotting and subsequently confirmed in the population of RA patients using ELISA. Most importantly, ELISA and Western blot results showed entirely consistent results. The autoantibodies against TTR were observed to be higher in RA patients which was not seen in the samples obtained from OA patients. In this context, our study opens a new door to further carry out the systematic investigation on the role of TTR in the pathogenesis of RA and the potential of TTR to serve as a novel biomarker in addition to the existing battery of biomarkers.

## References

- Smolen JS, Steiner G (2003) Therapeutic strategies for rheumatoid arthritis. *Nat Rev Drug Discov* 2: 473–488.
- Gay S, Gay RE, Koopman WJ (1993) Molecular and cellular mechanisms of joint destruction in rheumatoid arthritis: two cellular mechanisms explain joint destruction? *Ann Rheum Dis* 52: S39–S47.
- Mittler RS (2004) Suppressing the self in rheumatoid arthritis. *Nat Med* 10: 1047–1049.
- Bromberg J (2013) TNF $\alpha$  trips up Treg cells in rheumatoid arthritis. *Nat Med* 19: 269–270.
- Wolfe F (1997a) The prognosis of rheumatoid arthritis: assessment of disease activity and disease severity in the clinic. *Am J Med* 103: 12–18.
- Snir O, Widhe M, Hermansson M, VonSpee C, Linderberg J, et al. (2010) Antibodies to several citrullinated antigens are enriched in the joints of rheumatoid arthritis patients. *Arthritis Rheum* 62: 44–52.
- Ziff M (1990) Rheumatoid arthritis—its present and future. *J Rheumatol* 17: 127–133.
- Liao H, Wu J, Kuhn E, Chin W, Chang B, et al. (2004) Use of mass spectrometry to identify protein biomarkers of disease severity in the synovial fluid and serum of patients with rheumatoid arthritis. *Arthritis Rheum* 50: 3792–3803.
- Wang J, Zhou N, Xu B, Hao H, Kang L, et al. (2012) Identification and Cluster Analysis of *Streptococcus pyogenes* by MALDI-TOF Mass Spectrometry. *PloS One* 7: e0047152.
- Marchi N, Fazio V, Cucullo L, Kight K, Asaryk T, et al. (2003) Serum transthyretin monomer as a possible marker of blood-to-CSF barrier disruption. *J Neurosci* 23: 1949–1955.
- Davis PJ, Handwerker BS, Gregerman RI (1972) Thyroid hormone binding by human serum prealbumin (TBPA) electrophoretic studies of triiodothyronine-TBPA interaction. *J Clin Invest* 51: 515–521.
- Kanai M, Raz A, Goodman DS (1968) Retinol-binding protein: the transport protein for vitamin A in human plasma. *J Clin Invest* 47: 2025–2044.
- Peterson PA (1971) Characteristics of a vitamin A-transporting protein complex occurring in human serum. *J Biol Chem* 246: 34–43.
- Berry DC, Croniger CM, Ghyselincx NB, Noya (2012) Transthyretin Blocks Retinol Uptake and Cell Signaling by the Holo-Retinol-Binding Protein Receptor STRA6. *Mol Cell Biol* 19: 3851–3859.
- Gitlin D, Pericelli A (1970) Synthesis of serum albumin, prealbumin, alpha-fetoprotein, alpha-1-antitrypsin and transferrin by the human yolk sac. *Nature* 228: 995–997.
- Chang X, Zhao Y, Wang Y, Chen Y, Yan X (2013). Screening citrullinated proteins in synovial tissues of rheumatoid arthritis using 2-dimensional western blotting. *J Rheumatol* 40: 219–27.
- Saroha A, Kumar S, Chatterjee BP, Das HR (2012) Jacalin bound plasma O-glycoproteome and reduced sialylation of alpha 2-HS glycoprotein in rheumatoid arthritis patients. *PloS One* 7: e46374.

In conclusion, this study identified that TTR is a differentially expressed protein in the plasma, synovium and synovial fluid of RA patients. We also report that the TTR expression level is predominantly associated with the progression of severity of the disease. In addition, autoantibodies against TTR were present in the sera of RA patients. We propose that autoantibodies against TTR can be used as diagnostic tool for RA and its progression along with other tests. A systematic investigation on the role of TTR may help in better understanding of the pathogenesis of RA.

## Supporting Information

Figure S1 **MALDI TOF MS/MS spectrum of Transthyretin (TTR).**

(TIF)

Figure S2 **Pie chart shows the severity of disease in RA patients based on TTR levels.**

(TIF)

Figure S3 ***In vitro* validation of TTR expression.** Inflammation was induced by *E.coli* LPS in HepG2 cell line. TTR expression was found to be higher in treated supernatant as compared to untreated.

(TIF)

Figure S4 **TTR expression in synovial fluid.** Western blot analysis of synovial fluid demonstrated higher expression ( $p < 0.0019$ ) of TTR in RA patients ( $n = 6$ ) as compared to OA ( $n = 6$ ).

(TIF)

## Acknowledgments

We would like to acknowledge Dr. Shivender Kumar Srivastava, Orthopaedic Department, AIIMS, New Delhi for providing us RA and OA samples. We thank to Dr U. Mabalirajan, Trayambak Basak and Sandip Kumar Dash, Institute of Genomics and Integrative Biology, Delhi University Campus, Mall Road, Delhi for their support. We would like to thank Indian Council of Medical Research (ICMR), Ramalingaswami Bhawan, New Delhi, India for providing the financial support to carry out the research work.

## Author Contributions

Conceived and designed the experiments: SB SS SG. Performed the experiments: SS SG. Analyzed the data: SS SB SG LKS AS DSB RM OPG TKD. Contributed reagents/materials/analysis tools: SB SS LS. Wrote the paper: SS SB LKS YS RSS.

18. Biswas S, Sharma S, Saroha A, Bhakuni DS, Malhotra R, et al. (2013) Identification of novel autoantigen in the synovial fluid of rheumatoid arthritis patients using an immunoproteomics approach. *PLoS One* 8: e56246.
19. Bo GP, Zhou LN, He WF, Luo GX, Jia XF, et al. (2009) Analyses of differential proteome of human synovial fibroblasts obtained from arthritis. *Clin Rheumatol* 28: 191–199.
20. Hueber W, Tomooka BH, Batiwalla F, Li W, Monach PA, et al. (2009) Blood autoantibody and cytokine profiles predict response to anti-tumor necrosis factor therapy in rheumatoid arthritis. *Arthritis Res Ther* 11: R76.
21. Ahmad A, Mukherjee S, Pattnaik B, Kumar M, Singh S, et al. (2014) Miro1 regulates intracellular mitochondrial transport and enhances mesenchymal stem cell rescue efficacy. *EMBO J* "In press".
22. Smith RM, Charron MJ, Shah N, Lodish HF (1991) Immunoelectron microscopic demonstration of insulin-stimulated translocation of glucose transporters of plasma membrane of isolated rat adipocytes and masking of carboxy-terminal epitope of intracellular GLUT-4. *Proc Natl Acad Sci U S A* 88: 6893–6897.
23. Riveraa J, Cordeora RB, Nakouzia AS, Frasesb S, Nicolaa A, et al. (2010) *Bacillus anthracis* produces membrane-derived vesicle containing biologically active toxins. *Proc Natl Acad Sci, U S A* 107: 19002–19007.
24. Johnson AM, Merlini G, Sheldon J, Ichihara K (2007) Clinical indications of plasma protein assays: transthyretin (prealbumin) in inflammation and malnutrition. *Clin Chem Lab Med* 47: 419–426.
25. Sekine T, Masuko-Hongo K, Matsui T, Asahara H, Takigawa M, et al. (2001) Recognition of YKL-39, a human cartilage related protein, as a target antigen in patients with rheumatoid arthritis. *Ann Rheum Dis* 60: 49–54.
26. Tsuruha J, Masuko-Hongo K, Kato T, Sakata M, Nakamura H, et al. (2001) Implication of cartilage intermediate layer protein in cartilage destruction in subsets of patients with osteoarthritis and rheumatoid arthritis. *Arthritis Rheum* 44: 838–845.
27. Iwaki-Egawa S, Matsuno H, Yudoh K, Nakazawa F, Miyazaki K, et al. (2004) High diagnostic value of anticalpastatin autoantibodies in rheumatoid arthritis detected by ELISA using human erythrocyte calpastatin as antigen. *J Rheumatol* 31: 17–22.
28. Westhoff CM (2007) The structure and function of the Rh antigen complex. *Semin Hematol* 44: 42–50.
29. Drake RR, Cazares LH, Semmens OJ, Wardsworth JT (2005) Serum, salivary and tissue proteomics for discovery of biomarkers for head and neck cancers. *Expert Rev Mol Diagn* 5: 93–100.
30. Karpova MA, Moshkovskii SA, Toropygin IY, Archakov AI (2010) Cancer specific MALDI-TOF profile of blood serum and plasma: Biological meaning and perspectives. *J Proteomics* 73: 537–551.
31. Howard BA, Wang MZ, Campa MJ, Corro C, Fitzgerald MC, et al. (2003) Identification and validation of a potential lung cancer serum biomarker detected by matrix-assisted laser desorption/ionization- time of flight spectra analysis. *Proteomics* 9: 1720–1724.
32. Zheng Y, Xu Y, Ye B, Lei J, Weinstein MH (2003) Prostate carcinoma tissue proteomics for biomarker discovery. *Cancer* 15: 2576–2582.
33. Trocme C, Marotee H, Baillet A, Pallot-Prades B, Garin J, et al. (2009) Apolipoprotein A-I and platelet factor 4 are biomarkers for infliximab response in rheumatoid arthritis. *Ann Rheum Dis* 68: 1328–1333.
34. Niu Q, Huang Z, Shi Y, Wang L, Pan X, et al. (2010) Specific serum protein biomarkers of rheumatoid arthritis detected by MALDI-TOF-MS combined with magnetic beads. *Int Immunol* 22: 611–618.
35. Ni M, Wei W, Feng Q, Sun XG, Wang YC, et al. (2013) Transthyretin as a potential serological marker for the diagnosis of patients with early rheumatoid arthritis. *Clin Exp Rheumatol* 31: 394–399.
36. Kozak KR, Su F, Whitelegge JP, Faull K, Reddy S, et al. (2005) Characterization of serum biomarkers for detection of early stage ovarian cancer. *Proteomics* 5: 4589–4596.
37. Feng JT, Liu YK, Song HY, Dai Z, Qin LX, et al. (2005) Heat-shock protein 27: a potential biomarker for hepatocellular carcinoma identified by serum proteome analysis. *Proteomics* 5: 4581–4588.
38. Marten NW, Sladek FM, Straus DS (1996) Effect of dietary protein restriction on liver transcription factors. *Biochem J* 317: 361–370.
39. Escher N, Kaatz M, Melle C, Hiplery C, Ziemery M, et al. (2007) Posttranslational modifications of Transthyretin are serum markers in patients with Mycosis Fungoides. *Neoplasia* 9: 254–259.
